# Supplementary material for: Fast and Specific Peroxygenase Reactions Catalyzed by Fungal Mono-Copper Enzymes
Source: PubMed Central journal article supplement (PMC8638258; doi:10.1021/acs.biochem.1c00407), 2021-11-05
Supplement: bi1c00407_si_001.pdf [file bi1c00407_si_001.pdf]

# Fast and specific peroxygenase reactions catalyzed by fungal mono-copper enzymes

Lukas Rieder, Anton A. Stepnov, Morten Sørli, Vincent G.H. Eijsink\*

Faculty of Chemistry, Biotechnology, and Food Sciences, Norwegian University of Life Sciences (NMBU), P.O. Box 5003, NO-1432, Ås, Norway

\* For correspondence; E-mail: [vincent.eijsink@nmbu.no](mailto:vincent.eijsink@nmbu.no)

## Supporting information

### Table of contents

- Figure S1: HPLC product profiles for reactions of *NcAA9C* or *LsAA9A* with xylopentaose
- Figure S2: HPLC product profiles for reactions of *NcAA9C* or *LsAA9A* with mannopentaose
- Figure S3: HPLC product profiles for reactions of *AfAA11B* or *SmAA10A* with cellopentaose

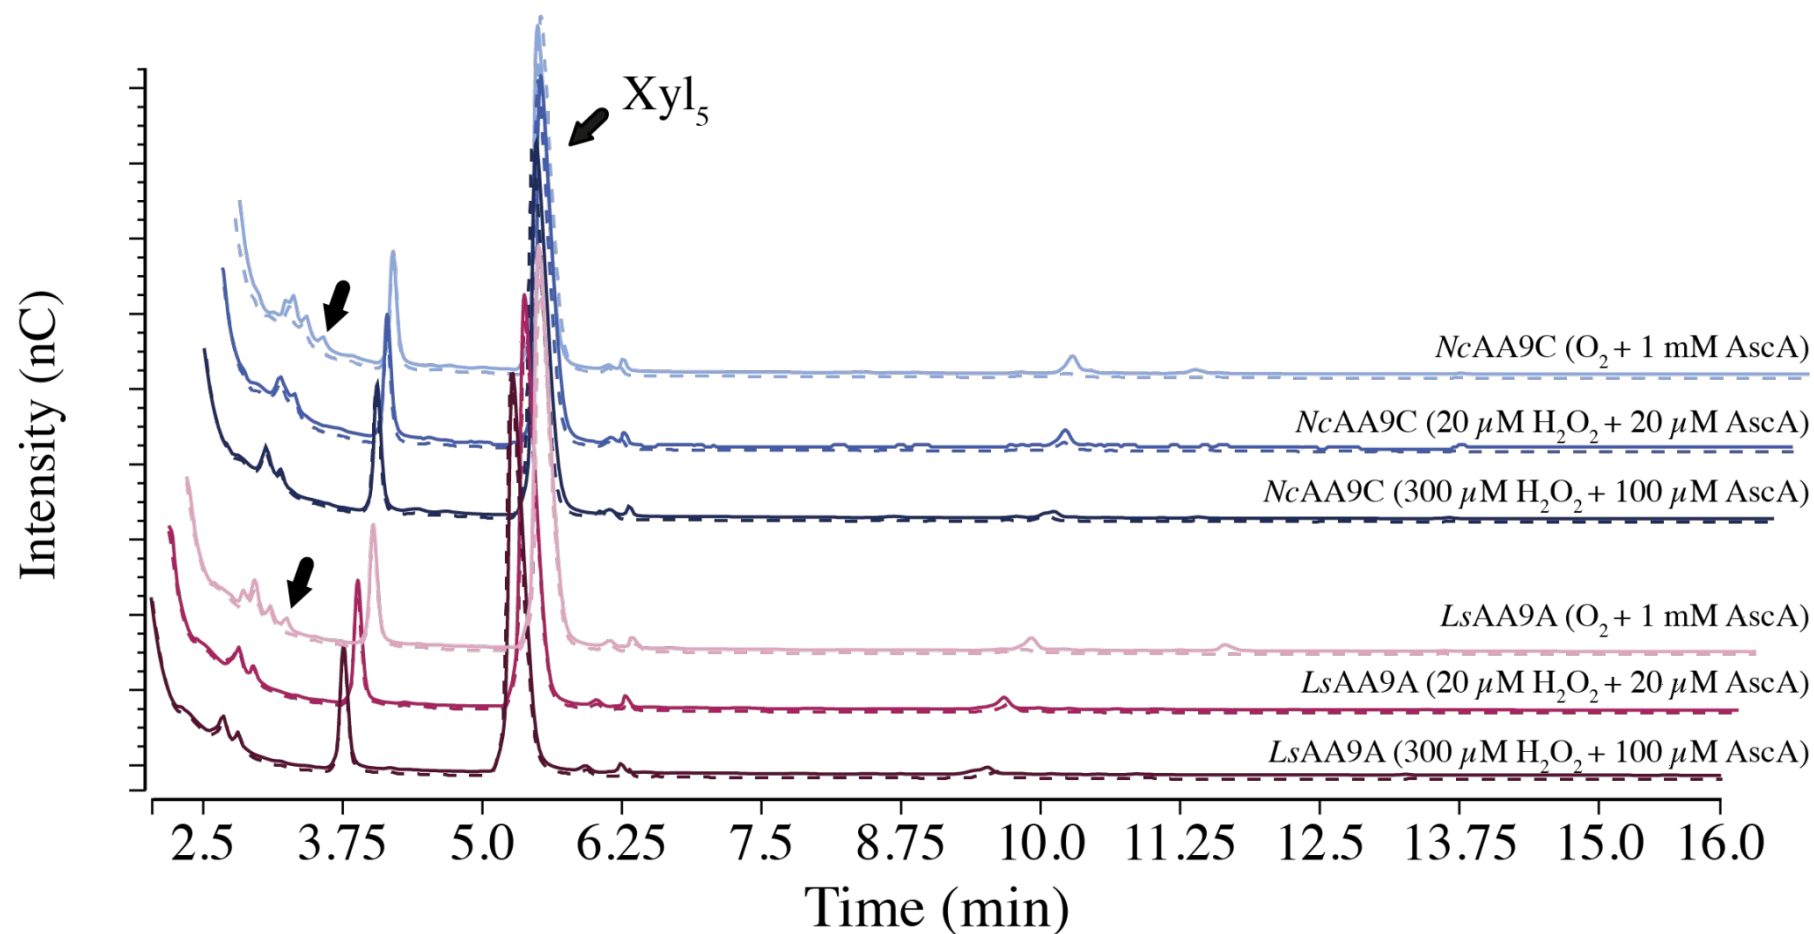

**Figure S1.** HPLC product profiles for reactions with  $1 \mu\text{M}$  *NcAA9C* (bluish colours) or *LsAA9A* (purple colours) and  $1 \text{ mM}$  xylopentaose performed under standard aerobic conditions with the additions indicated in the chromatograms, and incubated overnight, at  $37 \text{ }^\circ\text{C}$ . The dashed lines are chromatograms for

corresponding reactions without AscA. Unlabeled arrows indicate minor amounts of unidentified products that may derive from oxidative cleavage of xylopentaose.

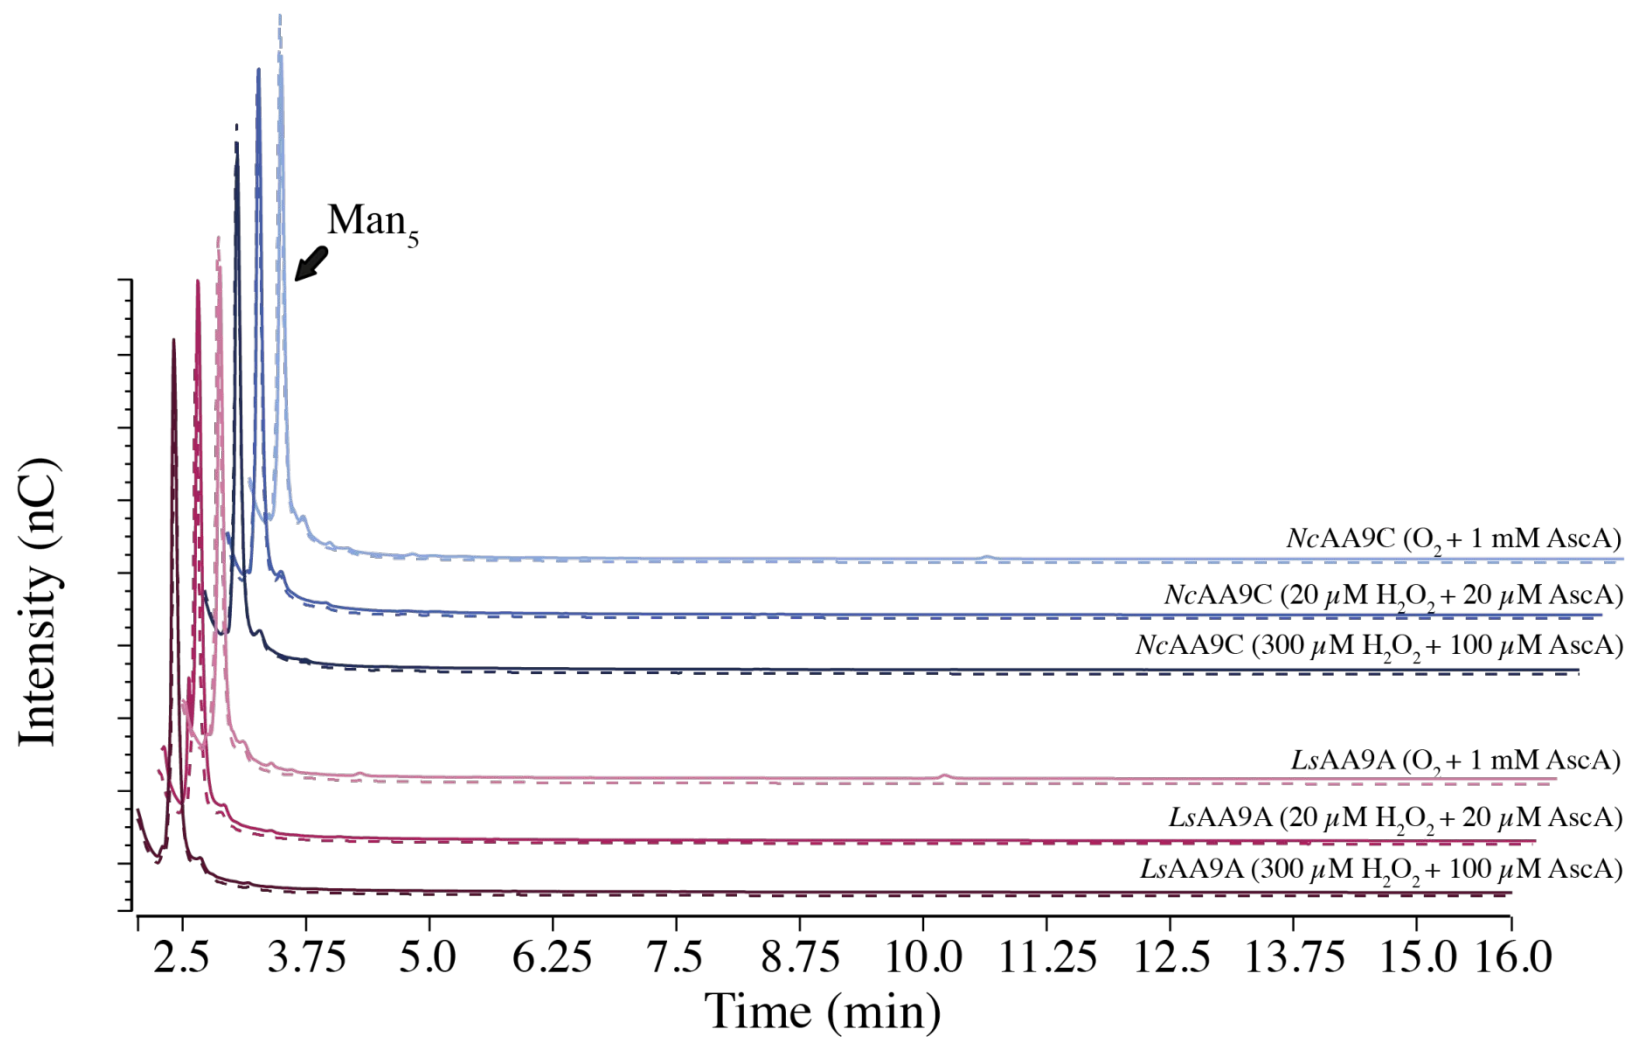

**Figure S2.** HPLC product profiles for reactions with 1  $\mu$ M *NcAA9C* (bluish colours) or *LsAA9A* (purple colours) and 1 mM mannopentaose performed under standard aerobic conditions with the additions indicated in the chromatograms, and incubated overnight, at 37 °C. The dashed lines are chromatograms for corresponding reactions without AscA.

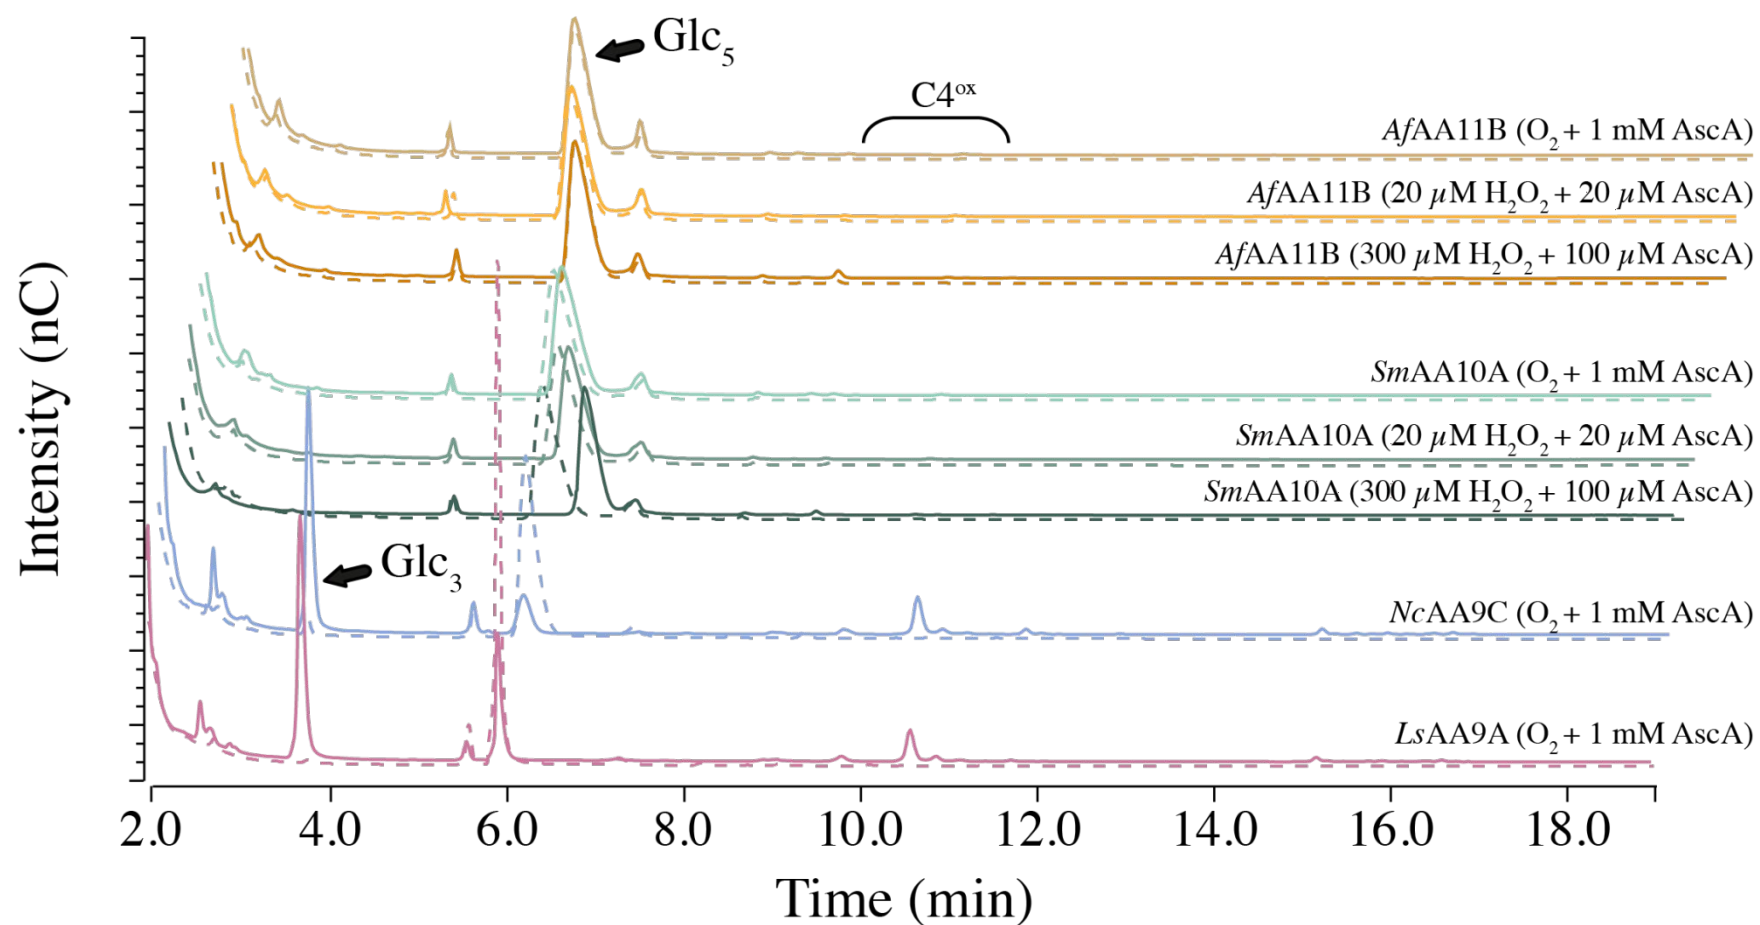

**Figure S3.** HPLC product profiles for reactions with 1  $\mu\text{M}$  *AfAA11B* (yellow colours) or *SmAA10A* (green colours) and 1 mM cellopentaose performed under standard aerobic conditions with the additions indicated in the chromatograms, and incubated overnight, at 37 °C. For comparison, positive controls

showing products generated upon aerobic overnight reactions with *NcAA9C* (blue) and *LsAA9A* (purple) are included. The position of peaks corresponding to C4-oxidized products is indicated by “C4<sup>ox</sup>”. The dashed lines are chromatograms for corresponding reactions without AscA.
